## 1 Cytokinin treatment of rice induces minimal effect on differential splicing compared to splicing 2 between tissues

3  
4 Nowlan Freese<sup>1\*</sup>, April R. Estrada<sup>1\*</sup>, Ivory C. Blakley<sup>1</sup>, Jinjie Duan<sup>2</sup>, Ann Loraine<sup>1\*\*</sup>

5 <sup>1</sup>Department of Bioinformatics and Genomics, University of North Carolina at Charlotte, Charlotte, NC,  
6 USA

7 <sup>2</sup>Bioinformatics Research Center, Aarhus University, C.F. Moellers Alle 8, Aarhus C, Denmark.

8  
9 \*Equal contribution.

10 \*\*Corresponding author.

### 11 12 **ABSTRACT**

13 Alternatively spliced genes produce multiple spliced isoforms, called transcript variants. In differential  
14 alternative splicing, the relative abundance of transcript variants differs across sample types. Differential  
15 alternative splicing is common in animal systems, but its extent and significance is not as well known in  
16 plants. We examined differential alternative splicing in rice seedlings using RNA-Seq data that included  
17 approximately 40 million sequence alignments per library, three libraries per sample type, and four  
18 sample types: roots and shoots plus and minus treatment with exogenous cytokinin, a versatile plant  
19 hormone that controls a myriad of developmental and stress-related processes in plants. Comparing read  
20 alignments to gene model annotations found that for 77% of alternative splicing events proposed in the  
21 gene models, each splicing choice was supported by at least one RNA-Seq read alignment. Most genes  
22 annotated as alternatively spliced favored one dominant isoform. Of splicing choices where there was  
23 abundant support for minor forms, most alternative splicing events affected protein-coding sequence.  
24 Statistical testing of read count proportions identified 90 genes as differentially spliced between rice roots  
25 and shoots. By contrast, only four genes were detected as differentially spliced in response to cytokinin.  
26 Ten differential splicing events were selected for validation via capillary gel electrophoresis analysis of  
27 reverse transcriptase-PCR products, using newly prepared samples from an independent experiment. In  
28 nine of ten cases, differential splicing between tissue types was confirmed. A tool for visualizing protein  
29 annotations in the context of genomic sequence (ProtAnnot) together with a genome browser (Integrated  
30 Genome Browser) were used to visualize and assess effects of differential splicing on gene function. In  
31 general, differentially spliced regions coincided with conserved regions in the encoded proteins,  
32 indicating that differential alternative splicing is likely to affect protein function between root and shoot  
33 tissue in rice.

### 34 35 **INTRODUCTION**

36 Differential splicing of pre-mRNA transcripts, called alternative splicing, enables one gene to  
37 produce multiple transcript variants encoding different functions. Alternative splicing is an almost  
38 universal phenomenon in higher eukaryotes, occurring to varying degrees in every animal and plant  
39 genome examined to date (Kalsotra and Cooper, 2011; Reddy et al., 2013). In animals, differential  
40 expression of splice variants has been recruited as a regulatory mechanism in multiple processes, such as  
41 sex determination in invertebrates and neuronal differentiation in mammals (Kalsotra and Cooper, 2011;  
42 Salz, 2011; Barbosa-Morais et al., 2012).

43 In plants, less is known about the functional significance and patterns of alternative splicing.  
44 However, several trends are apparent. Genes involved in circadian regulation are highly alternatively  
45 spliced, often producing multiple splice variants that fluctuate in concert with day/night cycling along  
46 with overall transcript abundance (Filichkin et al., 2015). The SR family of RNA-binding, splicing  
47 regulatory proteins is greatly expanded compared to mammals and includes many plant-specific forms  
48 (Kalyna and Barta, 2004; Barbosa-Morais et al., 2006; Plass et al., 2008; Filichkin et al., 2015). SR  
49 transcripts themselves are also highly alternatively spliced in plants, with the relative abundance of these  
50 alternative transcripts varying according to environmental stresses and hormones (Palusa et al., 2007;  
51 Gullege et al., 2012; Filichkin et al., 2015; Keller et al., 2016; Mei et al., 2017).

52 There is a growing body of evidence indicating cell and tissue specific regulation of alternative  
53 splicing in plants (Vitulo et al., 2014; Li et al., 2016; Sun et al., 2018). We previously found through  
54 analysis of expressed sequence tags (ESTs) that alternative splicing in the model plant *Arabidopsis*  
55 *thaliana* was highly skewed toward expression of a single dominant isoform (English et al., 2010).  
56 Analysis of RNA-Seq data from *Arabidopsis* pollen found the relative abundance of splice variants to be  
57 similar between leaves and pollen, despite the differences between the two tissues (Loraine et al., 2013).  
58 However, this latter analysis was limited by having just one biological replicate for pollen and only two  
59 biological replicates for leaves. A more comprehensive analysis of multiple *Arabidopsis* data sets found a  
60 high incidence of isoform switching, in which the identity of the most prevalent variant differs between  
61 sample types (Vanechoutte et al., 2017). However, this splicing diversity may have arisen in part from  
62 the heterogeneity of the data sets used, which were produced using different technologies at different  
63 times.

64 In this study, we used a well-replicated RNA-Seq data set from rice to re-examine prevalence of  
65 alternative splicing between tissues and sample types. This data set was previously generated to  
66 investigate cytokinin regulation of gene expression in roots and shoots from 10-day old rice seedlings  
67 (Raines et al., 2016). The data set included three biological replicates per sample type and four sample  
68 types – roots and shoots treated with exogenous cytokinin or a mock, vehicle-only treatment. The  
69 previous study found that cytokinin treatment triggered differential expression of around 5,000 and 2,300  
70 genes in roots and shoots, respectively. Previous work in *Arabidopsis* found that SR transcripts exhibit  
71 differential splicing when exposed to cytokinin, however, less is known about the effect of cytokinin on  
72 alternative splicing in rice (Palusa et al., 2007).

73 We found that the relative abundance of splice variants for most alternatively spliced genes was  
74 stable, with very few differentially spliced genes between cytokinin treated and control samples. There  
75 was nonetheless a small but significant number of genes that were differentially spliced between roots and  
76 shoots, with the majority of the differential splicing occurring within the protein-coding sequence. These  
77 results provide new evidence that differential alternative splicing likely contributes to gene function  
78 diversification between roots and shoots while playing little role in cytokinin response in rice.

## 80 MATERIALS & METHODS

### 82 RNA-Seq library preparation and sequencing

83 Samples were prepared and sequenced as described in (Raines et al., 2016). Rice seedlings  
84 (Nipponbare) were grown hydroponically for ten days in a growth chamber set to 14 hours light (28°C)  
85 and 8 hours of dark (23°C) with light intensity 700  $\mu\text{mol m}^{-2} \text{s}^{-1}$ . Around six to ten seedlings were grown  
86 in the same pot, in four pots. On the tenth day, culture media was replaced with new media containing 5  
87 mM of the cytokinin benzyladenine (BA) or 0.05 mM NaOH as a control. After 120 minutes, roots and  
88 shoots were harvested separately. Roots and shoots from treatment or control pots were pooled to form  
89 three replicates per treatment. RNA was extracted and used to synthesize twelve libraries from BA-treated  
90 and mock-treated roots and shoots. Libraries were sequenced on an Illumina HiSeq instrument for 100  
91 cycles, yielding 100 base, single end reads. Sequence data are available from the Sequence Read Archive  
92 under accession SRP04905. Aligned, processed data are available from the Oct. 2011 rice genome  
93 assembly IgbQuickload directories at <http://www.igbquickload.org>.

### 95 Data processing

96 Read sequences were aligned onto the *O. sativa japonica* genome assembly Os-Nipponbare-  
97 Reference-IRGSP-1.0 (released October 2011) using TopHat version and BowTie2 with default  
98 parameter settings except that the maximum intron size was set to 5,000 bases (Kawahara et al., 2013).

99 A command-line, Java program called “FindJunctions” was used to identify exon-exon junctions from  
100 gapped read alignments in the RNA-Seq data. FindJunctions produces BED format files containing  
101 junction features, and the score field of the BED file lists the number of read alignments that supported

102 the junction. Only reads that aligned to a unique location in the genome were considered. Source code and  
103 compiled versions of FindJunctions are available from <https://bitbucket.org/lorainelab/findjunctions>.

104

### 105 **Identification of alternative splicing events and differential splicing**

106 To date, there have been two major releases of *O. sativa japonica* gene models: the MSU7 gene set  
107 (Kawahara et al., 2013) and the RAP-Db gene set (Sakai et al., 2013). The two gene model sets contain  
108 mostly the same data, but the MSU7 gene models appear to be the most heavily used and are well-  
109 supported by informatics resources such as Gramene and Gene Ontology Consortium. For simplicity, and  
110 to take advantage of available functional annotations, we used the MSU7 annotations here.

111 Annotated alternative splicing events and the number of reads supporting each alternative were  
112 identified using the exon-intron overlap method described in (English et al., 2010). Exons and introns  
113 from pairs of gene models from the same locus were compared to identify alternatively spliced regions.  
114 Regions where an intron in one model overlapped an exon in another model on the same strand were  
115 identified and used to define mutually exclusive splicing choices (Figure 1). Gene models that included an  
116 alternatively spliced region were named “L” (for “Long”). Likewise, models that lacked an alternatively  
117 spliced region were designated “S” (for “Short”). Alternatively spliced regions were classified according  
118 to the type of alternative splicing, as follows. Regions flanked by alternative donor sites were designated  
119 “DS” for alternative donor site. Regions flanked by alternative acceptor sites were labeled “AS” for  
120 alternative acceptor site. AS and DS events that coincided with exon skipping were labeled “AS/ES” and  
121 “DS/ES”. Alternatively spliced regions arising from introns that the spliceosome sometimes failed to  
122 excise were designated “RI” for retained intron.

123 For each alternatively spliced region, read alignments that unambiguously supported one or the other  
124 splicing choice were counted. For AS and DS events, only gapped reads that aligned across intron  
125 junctions were counted as support. For RI events, gapped reads that aligned across the retained intron  
126 were counted as support for the intron-removed (S) form, and un-gapped reads that overlapped at least 20  
127 bases within the intron were counted as support for the intron-retained (L) form.

128 For each alternatively spliced region in each biological replicate, the number of reads supporting L or  
129 S, but not both, were used to calculate the percent-spliced-in (PSI) as  $N/M*100$ , where N was the number  
130 of reads supporting the L form and M was the number of reads that supported S or L but not both. This is  
131 the same as the splicing index described in (Katz et al., 2010). A two-sided t-test with equal variance  
132 assumption was used to compare PSI between sample types. Because PSI variance was large for events  
133 with small M (very few informative reads), only alternatively spliced regions where M was 10 or more in  
134 at least three replicate libraries were tested. A false discovery rate (FDR) was calculated for each test  
135 using the method of Benjamini and Hochberg, as implemented in the R programming language “p.adjust”  
136 method. Alternative splicing events with FDR less than or equal to 0.1 were considered differentially  
137 alternatively spliced.

138 Software used to identify and quantify alternative events is available from  
139 <https://bitbucket.org/lorainelab/altspliceanalysis>. Data analysis code used to analyze RNA-Seq data is  
140 available from <https://bitbucket.org/lorainelab/ricealtsplice>. Data analysis code is implemented as R  
141 Markdown files designed to be run in the RStudio development environment. Readers interested in  
142 experimenting with different analysis parameters can clone the repository, modify the code, and re-run  
143 analyses as desired.

144

### 145 **RT-PCR and capillary gel electrophoresis analysis of alternative splicing**

146 Differential alternative splicing detected by analysis of RNA-Seq was re-tested using RT-PCR-based  
147 fragment analysis method described in (Stamm et al., 2012). Differentially spliced regions were PCR-  
148 amplified and quantified using capillary gel electrophoresis. One benefit of the method is that the results  
149 are expressed as relative abundances of splice variants within a sample, thus eliminating the need to  
150 normalize using reference genes as in traditional qRT-PCR experiments aimed at measuring overall gene  
151 expression.

152 For splicing validation, new rice seedlings equivalent to the non-BA treated (control) samples used to  
153 generate RNA-Seq data were grown and harvested. Seedlings were grown hydroponically in pots  
154 containing either liquid media only or calcined clay granules (recommended in (Eddy et al., 2012))  
155 watered with liquid media. After twelve days of cultivation, plants were removed from the pots and roots  
156 and shoots were collected separately. Roots and shoots from the same pot were combined to form paired  
157 biological replicates. Samples were frozen on liquid nitrogen and stored at -80 degrees C prior to RNA  
158 extraction.

159 RNA was extracted using the RNeasy Plant Mini Kit from Qiagen following the manufacturer's  
160 instructions. First strand cDNA was synthesized using oligo dT primers and 1 µg of total RNA per 20 µL  
161 reaction. PCR amplification of cDNA was performed using primers flanking differentially spliced  
162 regions, including one primer labeled with 6-carboxyfluorescein (6-FAM) to enable amplicon detection  
163 via microcapillary electrophoresis. Cycle parameters included denaturation at 94°C for 2 minutes,  
164 followed by 24 cycles of 94°C for 15 sec, 50°C for 30 sec and 70°C for 1 min, with a final elongation step  
165 of 72°C for 10 minutes. This was essentially the same regime described in (Stamm et al., 2012) but with  
166 fewer cycles to ensure reactions were stopped before exiting the logarithmic phase. PCR products were  
167 combined with size standards and separated on a 3730 Genetic Analyzer (Life Technologies). Amplicons  
168 were quantified using manufacturer-provided software by calculating the area under each amplicon peak.  
169 The percentage of the variant containing the alternatively spliced region (%L, also called PSI for  
170 "percent-spliced-in") was calculated by dividing the long form area by the total area for both long and  
171 short forms. Spreadsheets with data exported from the instrument, along with PSI calculations, are  
172 available in the project git repository in a subfolder named "Experimental Testing."

173

## 174 **RESULTS**

175

### 176 **Most genes annotated as alternatively spliced favored one dominant isoform**

177 Using the exon-intron overlap method described previously (English et al., 2010), alternative splicing  
178 events within each gene were identified and annotated as shown in Figure 1. Following annotation of  
179 alternative splicing events, RNA-Seq read alignments from the libraries described in (Raines et al., 2016)  
180 were used to assess alternative splicing in the four sample types: roots and shoots from seedlings treated  
181 with the cytokinin compound benzyladenine (BA) or with a mock, control treatment. For each alternative  
182 splicing event, the number of sequence alignments unambiguously supporting each alternative was  
183 counted. These counts were used to calculate percent-spliced-in (PSI), the percentage of read alignments  
184 supporting the longer (L) isoform.

185 In the combined data from all libraries, 77% of AS events had at least one read supporting each of the  
186 two splicing choices, and 19.8% had support for just one splicing choice. Only 2.8% of AS events has no  
187 reads supporting either form; these corresponded to genes with low or no expression in any of the sample  
188 types tested.

189 Among the events with support for both choices, the distribution of read support skewed toward  
190 supporting a single choice (Figure 2). In 54% of annotated alternative splicing events, only 10% or fewer  
191 of informative read alignments supported the minor choice. In 70% of annotated alternative splicing  
192 events, only 20% or fewer alignments supported the lower frequency choice. Conversely, 30% of  
193 alternative splicing choices showed simultaneous expression of multiple choices in non-trivial amounts,  
194 e.g., at least 2 in 10 alignments supported the minor form.

195

### 196 **Genes with abundant support for both alternative splicing choices exhibited a wide range of functions**

197  
198 We used standard methods for Gene Ontology term enrichment to determine if specific categories of  
199 genes were enriched with genes in which alternative isoform expression was high. Specifically, we asked  
200 if there some Gene Ontology terms with significantly enriched with genes containing alternative splicing  
201 events in which the minor form frequency was at least 20%, i.e., genes occupying the center trough in  
202 Figure 2. Interestingly, we found that these genes exhibited a diversity of gene functions, but no

203 significant enrichment of functional categories were identified (Young et al., 2010). Thus, alternative  
204 splicing in which minor forms are highly prevalent affects genes with many functions in rice.

205

### 206 **Many rice genes are differentially spliced between roots and shoots but cytokinin hormone** 207 **application has minimal effect on splicing**

208 In animals, differential splicing between cell or tissue types contributes to cellular differentiation,  
209 especially in the nervous system (Naftelberg et al., 2015). Less is known about the role of alternative  
210 splicing in regulating cellular differentiation and other processes in plants. Rice shoots and roots are  
211 profoundly different tissues, but our previous analysis of this same data set found that many of the same  
212 genes were expressed in both (Raines et al., 2016). This raises the question of how these two different  
213 tissues are able to carry out their specialized roles, and suggest the hypothesis that differential splicing  
214 could enable differential functions in genes expressed in both tissues (Reddy et al., 2013). Our previous  
215 study of cytokinin on rice roots and shoots identified significant differences in gene expression in  
216 response to cytokinin exposure (Raines et al., 2016). However, little is known about the role alternative  
217 splicing during cytokinin response, except for one study in Arabidopsis that reported a shift in splicing of  
218 SR protein genes following cytokinin hormone treatment (Palusa et al., 2007). Therefore, we examined  
219 differential splicing in the rice RNA-Seq data set comparing root and shoot tissue with or without  
220 cytokinin.

221 First, we asked: When an alternatively spliced gene was expressed in two different sample types, was  
222 the relative abundance of splice variants the same or different? To address this, we examined correlation  
223 of PSI between roots and shoots or between BA-treated versus mock-treated samples (Figure 3). We  
224 found that PSI was similar between treated and untreated samples, as revealed by the tighter clustering of  
225 scatter plot points in Figures 3A and 3B. This indicated that genes that were alternatively spliced in BA-  
226 treated samples were also alternatively spliced in the controls, and that the relative abundance of splice  
227 variants was similar. Thus, the cytokinin hormone treatment had minimal effect on splicing. By contrast,  
228 there were many genes where the relative abundance of splice variants was different between roots and  
229 shoots (Figure 3C). Consistent with Figure 3, statistical testing of PSI differences between sample types  
230 identified 90 genes where PSI was significantly different between roots and shoots ( $FDR \leq 0.1$ ) but only  
231 four and two genes where PSI was different between cytokinin-treated samples and controls in roots and  
232 shoots, respectively (See Supplemental Table). Thus, we observed limited but non-trivial levels of  
233 differential alternative splicing between roots and shoots but minimal differential alternative splicing  
234 between control and BA-treated samples.

235

### 236 **Alternative splicing remodeled protein-coding sequence more often than disrupting it**

237 Alternative splicing can occur within the UTR or protein-coding regions of genes. Interestingly, 67%  
238 of the differential splicing between roots and shoots occurred within protein-coding regions (Table I and  
239 Supplemental Table I), suggesting that differential splicing is likely to affect gene function at the level of  
240 the protein product. In nearly every instance, major and minor isoforms were both detected, with  
241 differential splicing observed as a change in the relative abundance of the two forms.

242 In general, when alternatively spliced regions overlap the coding region of genes and the lengths of  
243 these regions are not multiples of three, then inclusion of these differential regions in transcripts is likely  
244 to introduce a frame shift, resulting in a premature stop codon and a truncated protein product. As shown  
245 in Table I, there was an enrichment of alternatively spliced regions in rice that were evenly divisible by  
246 three in coding regions versus non-coding in all subsets of the data. These subsets included all annotated  
247 alternatively spliced regions, regions where the minor form was unusually prevalent (the trough region of  
248 Figure 2), and differentially spliced regions. Thus, alternative splicing within the coding regions of genes  
249 was biased against introducing frame shifts and promoted protein remodeling rather than truncation.

250 To further understand the effects of splicing on protein-coding sequences, we visualized differentially  
251 spliced regions together with RNA-Seq alignments, coverage graphs, and inferred junctions using  
252 genome browsers. Two genome browsers were used to visualize the data - Integrated Genome Browser  
253 (Freese et al., 2016) and ProtAnnot (Mall et al., 2016). Integrated Genome Browser (IGB) was used to

254 examine RNA-Seq read alignments and compare alignments to the annotated gene structures. ProtAnnot,  
255 an IGB App, was used to search the InterPro database of conserved protein motifs to find out how (or if)  
256 splicing inferred from RNA-Seq data was likely to affect gene function through remodeling of protein  
257 motifs as detected by the InterProScan Web service (Finn et al., 2017).

258 Of the 105 differentially spliced regions, 71 overlapped protein-coding sequence regions, suggesting  
259 that in these cases, alternative splicing affected protein function. All but one (70/71) of the differentially  
260 spliced regions embedded in coding regions overlapped a predicted functional motif (e.g., a predicted  
261 transmembrane helix) or a region found by protein classification systems (e.g., Pfam (Finn et al., 2016) or  
262 PANTHER (Thomas et al., 2003)) to be conserved among members of the same protein family  
263 (Supplemental Table I and Figure 4).

#### 264 265 **RT-PCR with capillary gel electrophoresis confirmed differential splicing for nine of ten genes** 266 **tested**

267 We used a method based on capillary gel electrophoresis of fluorescently tagged PCR products to  
268 assay alternative splicing of ten genes detected as differentially spliced between rice roots and shoots  
269 (Stamm et al., 2012). New rice seedlings were grown under a close-to-identical replication of the RNA-  
270 Seq experiment. Primers were designed to amplify differentially spliced regions, including one primer  
271 that was conjugated to a fluorescent tag. Following PCR amplification of cDNA prepared from the new  
272 rice samples, products were resolved on a capillary-based sequencer and PSI calculated (Table II). In nine  
273 out of ten genes, differential alternative splicing was confirmed. In the one case where differential  
274 alternative splicing was not confirmed, there were very few RNA-Seq read alignments covering the  
275 differentially spliced region, suggesting this was likely a false positive result. The FDR cutoff used to  
276 detect differential splicing in the RNA-Seq data was 0.1, corresponding to 1 in 10 false discoveries, in  
277 line with results from the microcapillary-based analysis.

#### 278 279 **DISCUSSION**

280 In this study we profiled the prevalence of alternative splicing using a well-replicated RNA-Seq data  
281 from 10-day old rice roots and shoots, treated or untreated with exogenous benzyl adenine, a synthetic  
282 cytokinin hormone. We found there was at least one RNA-Seq read supporting each annotated alternative  
283 splicing choice for most of the annotated alternative splicing events, with a distribution skewed toward  
284 supporting a single splicing choice. We identified very few differences in splicing between cytokinin  
285 treated samples and mock, whereas we observed limited but significant differential splicing between roots  
286 and shoots, with the majority of those differences falling within the protein coding region of transcripts.

287 The observation of very little differential splicing between cytokinin-treated and mock-treated  
288 samples was surprising due to previous evidence in *Arabidopsis* (Palusa et al., 2007). Cytokinin exposure  
289 of *Arabidopsis* seedlings by Palusa et al. identified several SR genes that were differentially spliced when  
290 exposed to cytokinin (Palusa et al., 2007). SR proteins regulate splicing choices in other species as well as  
291 being alternatively spliced themselves (Filichkin et al., 2015). Therefore, we had expected to observe  
292 cytokinin-induced differential splicing of SR genes in rice that would also affect other genes. However,  
293 we detected no rice SR protein differential splicing of SR proteins between cytokinin- and mock-treated  
294 rice samples and only four differentially spliced genes between roots and two in shoots.

295 The relative lack of differential splicing between cytokinin-treated and mock-treated samples suggests  
296 that cytokinin signaling does not employ alternative splicing as a regulatory mechanism in rice. Cytokinin  
297 signaling involves transfer of phosphate groups between successive elements of a phosphorelay signaling  
298 pathway culminating in phosphorylation-dependent activation of Myb-type transcription factor proteins  
299 called type B ARR (Raines et al., 2016). Thus, regulation of type B ARR transcription factor activity  
300 occurs at the level of protein, and cytokinin treatment has no or little effect on transcription of type B  
301 ARRs. In addition, most type B transcriptional regulators and other members of the cytokinin signaling  
302 pathway are not highly alternatively spliced. By contrast, a closely related family of similar genes  
303 encoding so-called “pseudo-response regulators” have similar sequence to type B ARRs and are highly  
304 alternatively spliced. Further study is necessary to discern why cytokinin exposure in rice has so few

305 differences in splicing, whether this is true for all monocots, and how the response to cytokinin compares  
306 to dicots such as *Arabidopsis* and if that indicates differences in cytokinin response in general.

307 In comparison to the number of differentially spliced genes due to cytokinin exposure, there was a  
308 comparatively large number of differentially spliced genes between shoots and roots. There is a growing  
309 body of evidence that alternative splicing is cell, tissue, and stage specific (Vitulo et al., 2014; Gupta et  
310 al., 2015; Li et al., 2016; Sun et al., 2018). Although the alternatively spliced genes with high minor form  
311 frequency were not enriched for particular Gene Ontology terms, this lack of concentrated function  
312 suggests that alternative splicing has been recruited as a mechanism for diversification of gene function. It  
313 is of note that the majority of differential splicing between roots and shoots fell within protein-coding  
314 sequence, and of those events, nearly all splicing events affected a predicted motif.

315 In our previous comparison of rice root and shoot tissue, we found that the overall diversity of gene  
316 expression in roots and shoots was similar, but with the most highly expressed genes reflecting tissue-  
317 specific differences (Raines et al., 2016). Sun et al. found that clustering of cucumber tissues by  
318 alternative splicing profiles placed leaf/stem far from root tissue (Sun et al., 2018). It is likely that  
319 alternative splicing plays a role in further delineating differences in expression between these tissues.

320

## 321 **CONCLUSION**

322 By analyzing the number of reads that supported different splice variants, we identified examples of  
323 differential splicing with confirmation by RT-PCR with capillary gel electrophoresis. There were 90  
324 genes differentially spliced between root and shoot tissues, but only four between cytokinin-treated and  
325 non-treated samples. For most differential splicing events, the protein-coding regions were affected,  
326 strongly suggesting that differential splicing is playing a role in modulating gene function between roots  
327 and shoots.

328

## 329 **FUNDING AND SUPPORT**

330 This material is based upon work supported by the National Science Foundation through the Postdoctoral  
331 Research Fellowship in Biology under Grant No.1523814 awarded to Nowlan Freese and the Plant  
332 Genome Research Program award number IOS-1238051. NIH award 2R01GM103463-06A1 to AL  
333 supports development of the IGB software.

334 **Table I.** Alternative splicing choices producing difference regions evenly divisible by three or with  
335 remainder of 1 or 2. P-value obtained from a binomial test of the null hypothesis that the true probability  
336 of a differentially spliced region having a length divisible by three is 1 in 3 and an alternative hypothesis  
337 that the probability is greater than 1 in 3.  
338

| Alternative Splicing |                                    | Divisible<br>by 3 | Remainder<br>of 1 | Remainder<br>of 2 | P-value |
|----------------------|------------------------------------|-------------------|-------------------|-------------------|---------|
| Location             | Event                              |                   |                   |                   |         |
| Coding region        | Annotated as alternatively spliced | 3,248             | 2,466             | 2,411             | 3e-36   |
| UTR                  | Annotated as alternatively spliced | 1,152             | 1,127             | 1,113             | 1       |
| Coding region        | Minor form is expressed            | 173               | 149               | 153               | 8e-6    |
| UTR                  | Minor form is expressed            | 34                | 20                | 13                | 0.03    |
| Coding region        | Differentially spliced             | 33                | 24                | 18                | 0.03    |
| UTR                  | Differentially spliced             | 6                 | 5                 | 11                | 0.79    |

339



340 **Table II.** Differential splicing detected using RNA-Seq and re-tested using capillary gel electrophoresis  
 341 (CGE). P is the p-value obtained from comparing roots and shoots PSI from CGE.  
 342

| Gene ID        | Description                       | AS type | Avg. RPKM Expression |       | RNA-Seq PSI (%L) |       | CGE PSI (%L) |       | P-value  |
|----------------|-----------------------------------|---------|----------------------|-------|------------------|-------|--------------|-------|----------|
|                |                                   |         | Root                 | Shoot | Root             | Shoot | Root         | Shoot |          |
| LOC_Os01g25484 | ferredoxin nitrite reductase      | RI      | 300                  | 131   | 74.2             | 31.7  | 29.9         | 13    | 5e-05    |
| LOC_Os01g35580 | unknown                           | AS      | 55.7                 | 34.9  | 44.0             | 66.3  | 49.9         | 66.9  | 2.47e-04 |
| LOC_Os01g45274 | carbonic anhydrase                | ES      | 171                  | 1,380 | 96.8             | 24.3  | 97.4         | 15.4  | 3e-09    |
| LOC_Os01g51290 | protein kinase                    | RI      | 49.6                 | 49.9  | 88.4             | 95.1  | 13.3         | 17.2  | 0.03466  |
| LOC_Os03g05390 | citrate transporter               | RI      | 219                  | 174   | 86.0             | 96.3  | 86           | 95.5  | 1.2e-04  |
| LOC_Os12g08260 | dehydrogenase E1                  | RI      | 8.03                 | 30.3  | 55.7             | 2.9   | 4.1          | 0.87  | 3e-05    |
| LOC_Os01g61670 | ureidoglycolate hydrolase         | DS      | 59                   | 37.8  | 78.0             | 31.0  | 59           | 37.8  | 1.6e-09  |
| LOC_Os05g48040 | MATE efflux family protein        | DS      | 7.05                 | 6.72  | 88.1             | 100.0 | 89.4         | 88.27 | 0.632    |
| LOC_Os02g05830 | ribulose bisphosphate carboxylase | RI      | 4.79                 | 12.3  | 88.2             | 10.1  | 23.9         | 3.06  | 8e-04    |
| LOC_Os06g05110 | superoxide dismutase              | RI      | 12.5                 | 39.7  | 38.5             | 13.6  | 22.7         | 6.5   | 1.3e-07  |

343  
 344

345 **Supplemental Table I.** Excel spreadsheet file (SuppTable\_PSI.xlsx) is provided as a supplement. The  
346 spreadsheet contains output of R script SplicingAnalysis.Rmd run with “coverage\_threshold” parameter  
347 set to 10, where coverage\_threshold is the number of reads overlapping a differentially spliced region  
348 which supports one or the other splicing choice when comparing mutually exclusive splicing choices. The  
349 R script resides in the project source code repository (<https://bitbucket.org/lorainelab/ricealtsplice>) in the  
350 “AltSplice” subfolder. Data files produced by the script reside in subfolder “AltSplice/results”. The  
351 spreadsheet SuppTable\_PSI.xlsx contains worksheets copied from script output files  
352 rootsVshoots\_MSU7\_10.xlsx, roots\_MSU7\_10.xlsx, and shoots\_MSU7\_10.xlsx. The worksheet  
353 comparing roots and shoots alternative splicing (from rootsVshoots\_MSU7\_10.xlsx) was edited by hand  
354 to include information obtained from manual examination of differentially spliced genes and regions  
355 using Integrated Genome Browser and ProtAnnot. A key describing each column and its meaning is also  
356 included. The first column of each data worksheet contains hyperlinked alternatively spliced region  
357 identifiers. To use the hyperlinks, users should first download and launch Integrated Genome Browser  
358 from <http://bioviz.org>. Clicking the links sends a message to Integrated Genome Browser instructing it to  
359 zoom and scroll to the alternatively spliced region. Users can then open and view RNA-Seq data sets from  
360 the study by selecting the RNA-Seq folder in the **Available Data Sets** section of the IGB **Data Access**  
361 tab.

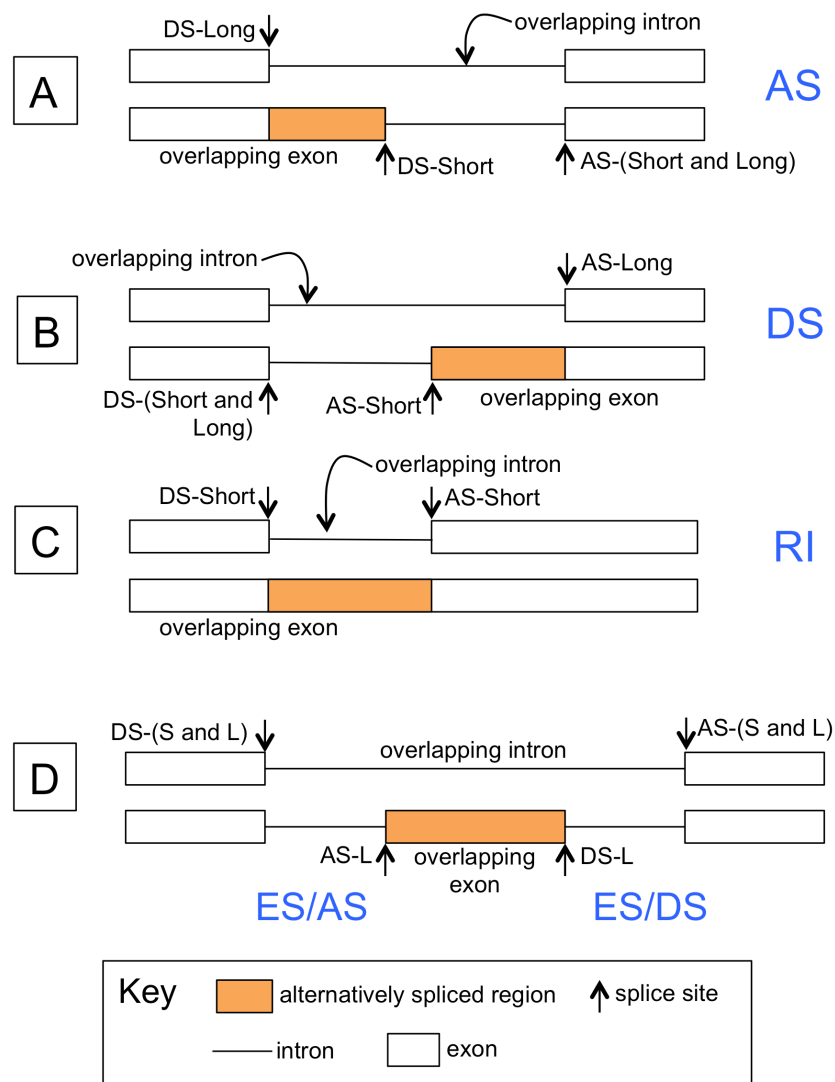

362  
 363 **Figure 1. Alternative splicing annotation.** The overlap between an intron in one gene model and an  
 364 exon in another gene model defines an alternatively spliced region. Arrows indicate splice sites, named  
 365 AS for acceptor site and DS for donor site. Use of sites named AS-L or DS-L causes inclusion of the  
 366 differentially spliced region, generating the longer (L) isoform. Similarly, DS-S and AS-S refer to sites  
 367 that exclude the differentially spliced region and generate the shorter (S) isoform. **(A)** Alternative donor  
 368 sites, in which the U2 snRNP complex forms at alternative locations on the 5' end of introns. **(B)**  
 369 Alternative acceptor sites, in which the U1 snRNP complex forms at alternative sites near the 3' end of  
 370 alternatively spliced introns. **(C)** Alternatively spliced intron, in which a donor/acceptor site pairing can  
 371 either be used or not used, forming a retained intron (RI). **(D)** Alternatively spliced, skipped exon. In  
 372 exon skipping, alternative splicing involves four sites, indicated by DS-S/L, AS-L, DS-L, and SD-S/L.  
 373 Exon inclusion requires assembly of two spliceosome complexes linking DS-S/L with AS-L and DS-L  
 374 with AS-S/L, while exon skipping requires linking DS-S/L and AS-S/L only.  
 375

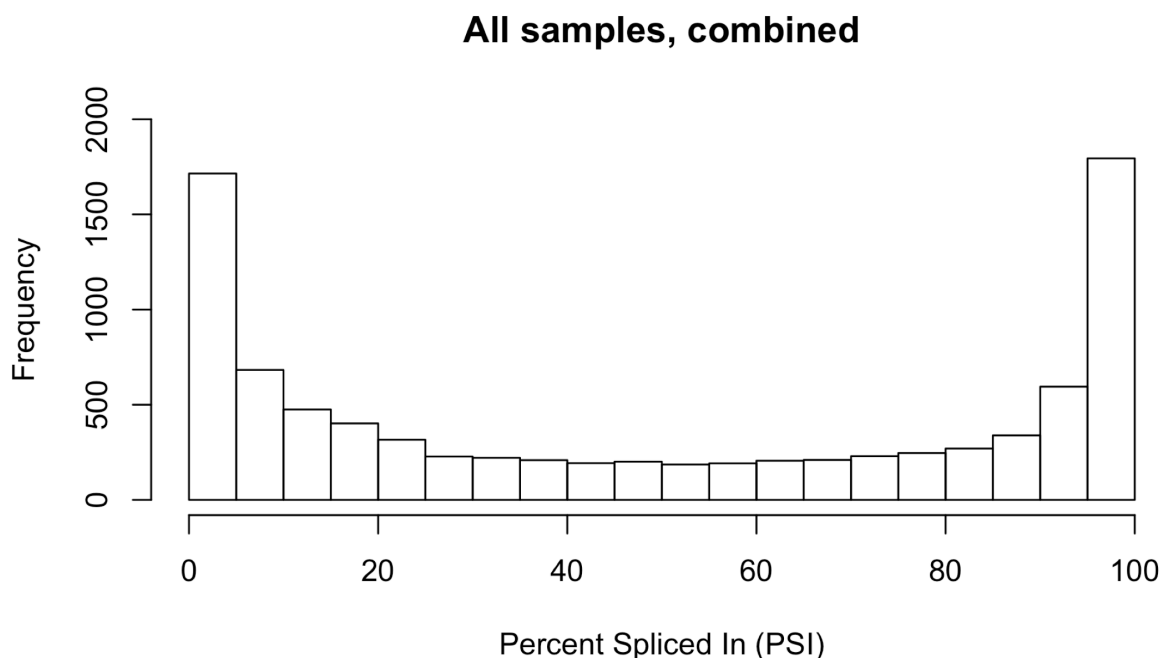

376  
377 **Figure 2. Distribution of percent-spliced-in (PSI) for annotated splicing events where each choice**  
378 **was supported by at least one RNA-Seq alignment.** PSI was calculated as  $100 * L / (S + L)$ , where L and  
379 S were the number of reads that supported the splicing choice that included (L) or excluded (S) the  
380 differentially spliced region. Read alignment counts from all twelve libraries were combined to obtain a  
381 global view of alternative splicing occurrence in rice seedlings. The U-shaped character of the distribution  
382 persisted whether lower or higher thresholds of informative reads were used.  
383

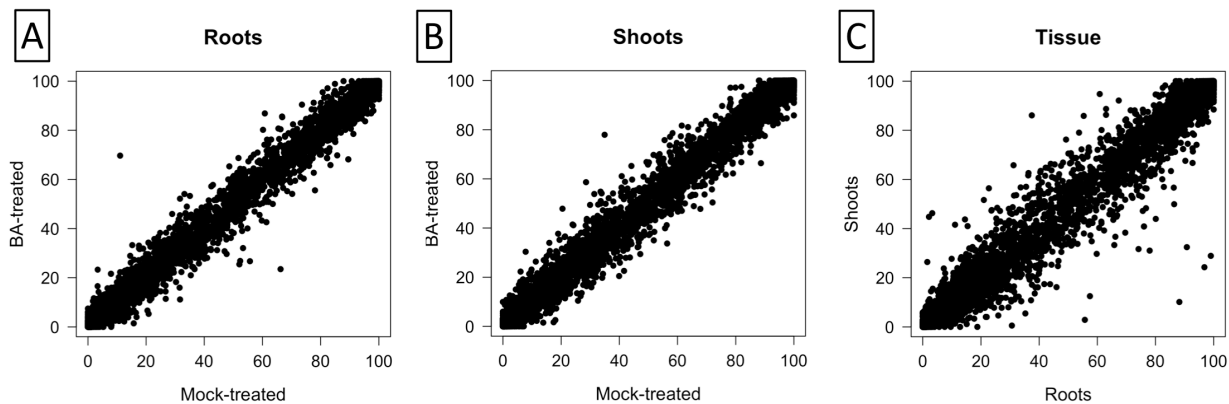

384  
385 **Figure 3. Scatter plots comparing percent- spliced-in (PSI) between sample types for annotated**  
386 **splicing events.** PSI was calculated from RNA-Seq reads obtained from sequencing rice seedling shoots  
387 and roots grown hydroponically and subjected to a two-hour treatment with BA, a cytokinin analog, or a  
388 mock-treatment (control). PSI is the average of three biological replicates. Only events with at least 15  
389 informative read alignments in all six samples being compared were included. (A) BA-treated rice roots  
390 (y axis) compared to mock roots (x axis). (B) BA-treated rice shoots (y axis) compared to mock shoots (x  
391 axis). (C) Mock shoots (y axis) compared to mock roots (x axis)  
392

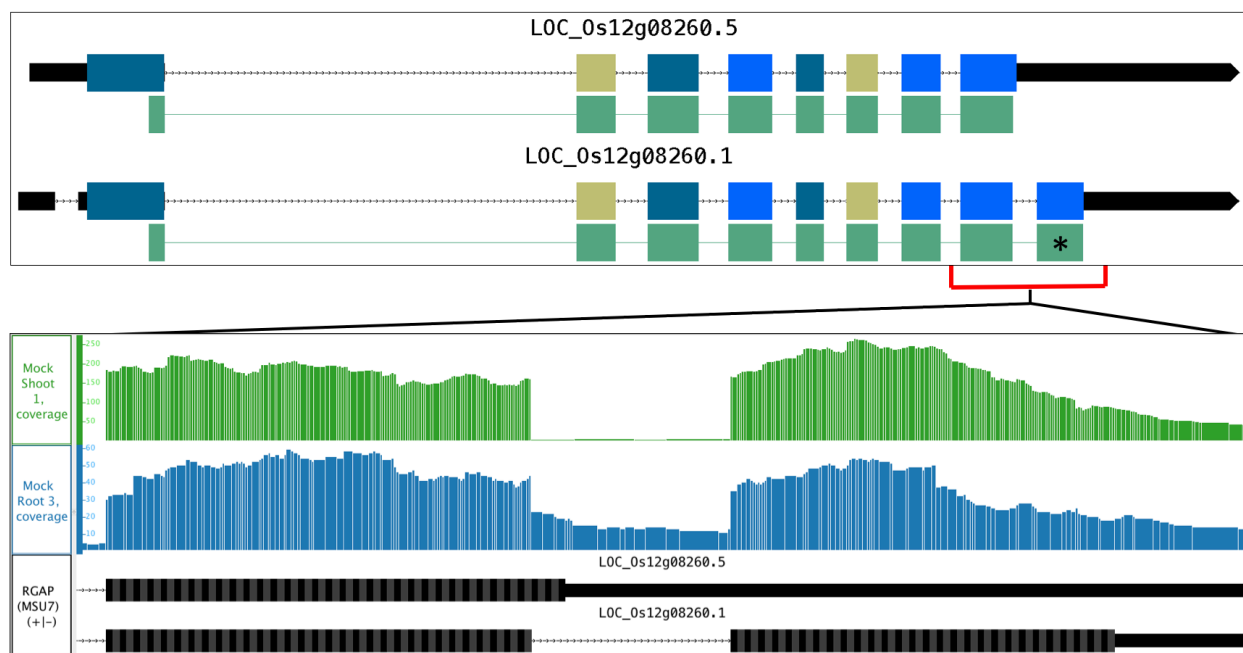

393  
394  
395  
396  
397  
398  
399  
400  
401  
402

**Figure 4. ProtAnnot and IGB images showing difference in splicing between shoot and root.**

ProtAnnot (upper panel) shows coding region exons color-coded by frame, with regions matching InterPro profiles indicated by green, linked rectangles. Asterisk highlights difference in the PANTHER InterPro profile PTHR11516 between isoforms 1 and 5 of the LOC\_Os12g08260 gene. Integrated Genome Browser (lower panels) shows a zoomed-in view of RNA-Seq coverage graphs from rice root (blue) and shoot (green). Y-axis is the number of RNA-Seq aligned sequences with MSU7 gene models in black below.

403  
404  
405  
406  
407  
408  
409  
410  
411  
412  
413  
414  
415  
416  
417  
418  
419  
420  
421  
422  
423  
424  
425  
426  
427  
428  
429  
430  
431  
432  
433  
434  
435  
436  
437  
438  
439  
440  
441  
442  
443  
444  
445  
446  
447  
448  
449  
450  
451

## REFERENCES CITED

- Barbosa-Morais NL, Carmo-Fonseca M, Aparício S** (2006) Systematic genome-wide annotation of spliceosomal proteins reveals differential gene family expansion. *Genome Research* **16**: 66-77
- Barbosa-Morais NL, Irimia M, Pan Q, Xiong HY, Gueroussov S, Lee LJ, Slobodeniuc V, Kutter C, Watt S, Colak R, Kim T, Misquitta-Ali CM, Wilson MD, Kim PM, Odom DT, Frey BJ, Blencowe BJ** (2012) The evolutionary landscape of alternative splicing in vertebrate species. *Science* **338**: 1587-1593
- Eddy R, Hahn DT, Moulton T** (2012) Optimizing Greenhouse Rice Production: What Is the Best Root Medium? *Purdue Methods for Rice Growth*
- English AC, Patel KS, Loraine AE** (2010) Prevalence of alternative splicing choices in *Arabidopsis thaliana*. *BMC Plant Biol* **10**: 102
- Filichkin S, Priest HD, Megraw M, Mockler TC** (2015) Alternative splicing in plants: directing traffic at the crossroads of adaptation and environmental stress. *Current Opinion in Plant Biology* **24**: 125-135
- Filichkin Sergei A, Cumbie Jason S, Dharmawardhana P, Jaiswal P, Chang Jeff H, Palusa Saiprasad G, Reddy ASN, Megraw M, Mockler Todd C** (2015) Environmental Stresses Modulate Abundance and Timing of Alternatively Spliced Circadian Transcripts in *Arabidopsis*. *Molecular Plant* **8**: 207-227
- Finn RD, Attwood TK, Babbitt PC, Bateman A, Bork P, Bridge AJ, Chang H-Y, Dosztányi Z, El-Gebali S, Fraser M, Gough J, Haft D, Holliday GL, Huang H, Huang X, Letunic I, Lopez R, Lu S, Marchler-Bauer A, Mi H, Mistry J, Natale DA, Necci M, Nuka G, Orengo CA, Park Y, Pesseat S, Piovesan D, Potter SC, Rawlings ND, Redaschi N, Richardson L, Rivoire C, Sangrador-Vegas A, Sigrist C, Sillitoe I, Smithers B, Squizzato S, Sutton G, Thanki N, Thomas PD, Tosatto Silvio C E, Wu CH, Xenarios I, Yeh L-S, Young S-Y, Mitchell AL** (2017) InterPro in 2017—beyond protein family and domain annotations. *Nucleic Acids Research* **45**: D190-D199
- Finn RD, Coggill P, Eberhardt RY, Eddy SR, Mistry J, Mitchell AL, Potter SC, Punta M, Qureshi M, Sangrador-Vegas A, Salazar GA, Tate J, Bateman A** (2016) The Pfam protein families database: towards a more sustainable future. *Nucleic Acids Research* **44**: D279-D285
- Freese NH, Norris DC, Loraine AE** (2016) Integrated genome browser: visual analytics platform for genomics. *Bioinformatics* **32**: 2089-2095
- Gulledge AA, Roberts AD, Vora H, Patel K, Loraine AE** (2012) Mining *Arabidopsis thaliana* RNA-seq data with Integrated Genome Browser reveals stress-induced alternative splicing of the putative splicing regulator SR45a. *American journal of botany* **99**: 219-231
- Gupta V, Estrada AD, Blakley I, Reid R, Patel K, Meyer MD, Andersen SU, Brown AF, Lila MA, Loraine AE** (2015) RNA-Seq analysis and annotation of a draft blueberry genome assembly identifies candidate genes involved in fruit ripening, biosynthesis of bioactive compounds, and stage-specific alternative splicing. *Gigascience* **4**: 5
- Kalsotra A, Cooper TA** (2011) Functional consequences of developmentally regulated alternative splicing. *Nature Reviews. Genetics* **12**: 715-729
- Kalyna M, Barta A** (2004) A plethora of plant serine/arginine-rich proteins: redundancy or evolution of novel gene functions? *Biochemical Society transactions* **32**: 561-564
- Katz Y, Wang ET, Airoidi EM, Burge CB** (2010) Analysis and design of RNA sequencing experiments for identifying isoform regulation. *Nat Methods* **7**: 1009-1015
- Kawahara Y, de la Bastide M, Hamilton JP, Kanamori H, McCombie WR, Ouyang S, Schwartz DC, Tanaka T, Wu J, Zhou S, Childs KL, Davidson RM, Lin H, Quesada-Ocampo L, Vaillancourt B, Sakai H, Lee SS, Kim J, Numa H, Itoh T, Buell CR, Matsumoto T** (2013) Improvement of the *Oryza sativa* Nipponbare reference genome using next generation sequence and optical map data. *Rice* **6**: 1-10

- 452 **Keller M, Hu Y, Mesihovic A, Fragkostefanakis S, Schleiff E, Simm S** (2016) Alternative splicing in  
453 tomato pollen in response to heat stress. *DNA Research*: dsw051
- 454 **Li S, Yamada M, Han X, Ohler U, Benfey PN** (2016) High resolution expression map of the  
455 Arabidopsis root reveals alternative splicing and lincRNA regulation. *Developmental cell* **39**: 508-  
456 522
- 457 **Loraine AE, McCormick S, Estrada A, Patel K, Qin P** (2013) RNA-seq of Arabidopsis pollen  
458 uncovers novel transcription and alternative splicing. *Plant Physiol* **162**: 1092-1109
- 459 **Mall T, Eckstein J, Norris D, Vora H, Freese NH, Loraine AE** (2016) ProtAnnot: an App for  
460 Integrated Genome Browser to display how alternative splicing and transcription affect proteins.  
461 *Bioinformatics* **32**: 2499-2501
- 462 **Mei W, Boatwright L, Feng G, Schnable JC, Barbazuk WB** (2017) Evolutionarily Conserved  
463 Alternative Splicing Across Monocots. *Genetics* **207**: 465-480
- 464 **Naftelberg S, Schor IE, Ast G, Kornblihtt AR** (2015) Regulation of alternative splicing through  
465 coupling with transcription and chromatin structure. *Annual review of biochemistry* **84**: 165-198
- 466 **Palusa SG, Ali GS, Reddy ASN** (2007) Alternative splicing of pre-mRNAs of Arabidopsis  
467 serine/arginine-rich proteins: regulation by hormones and stresses. *The Plant Journal* **49**: 1091-1107
- 468 **Plass M, Agirre E, Reyes D, Camara F, Eyraas E** (2008) Co-evolution of the branch site and SR  
469 proteins in eukaryotes. *Trends in Genetics* **24**: 590-594
- 470 **Raines T, Blakley IC, Tsai Y-C, Worthen JM, Franco-Zorrilla JM, Solano R, Schaller GE, Loraine  
471 AE, Kieber JJ** (2016) Characterization of the cytokinin-responsive transcriptome in rice. *BMC Plant  
472 Biology* **16**: 260
- 473 **Reddy ASN, Marquez Y, Kalyna M, Barta A** (2013) Complexity of the Alternative Splicing Landscape  
474 in Plants. *The Plant Cell* **25**: 3657-3683
- 475 **Sakai H, Lee SS, Tanaka T, Numa H, Kim J, Kawahara Y, Wakimoto H, Yang CC, Iwamoto M,  
476 Abe T, Yamada Y, Muto A, Inokuchi H, Ikemura T, Matsumoto T, Sasaki T, Itoh T** (2013) Rice  
477 Annotation Project Database (RAP-DB): an integrative and interactive database for rice genomics.  
478 *Plant Cell Physiol* **54**: e6
- 479 **Salz HK** (2011) Sex Determination in Insects: a binary decision based on alternative splicing. *Current  
480 opinion in genetics & development* **21**: 395-400
- 481 **Stamm S, Smith C, Lührmann R** (2012) *Alternative pre-mRNA Splicing: Theory and Protocols*. Wiley-  
482 Blackwell
- 483 **Sun Y, Hou H, Song H, Lin K, Zhang Z, Hu J, Pang E** (2018) The comparison of alternative splicing  
484 among the multiple tissues in cucumber. *BMC Plant Biology* **18**: 5
- 485 **Thomas PD, Campbell MJ, Kejariwal A, Mi H, Karlak B, Daverman R, Diemer K, Muruganujan  
486 A, Narechania A** (2003) PANTHER: A Library of Protein Families and Subfamilies Indexed by  
487 Function. *Genome Research* **13**: 2129-2141
- 488 **Vanechoutte D, Estrada AR, Lin YC, Loraine AE, Vandepoele K** (2017) Genome-wide  
489 characterization of differential transcript usage in Arabidopsis thaliana. *Plant J* **92**: 1218-1231
- 490 **Vitulo N, Forcato C, Carpinelli EC, Telatin A, Campagna D, D'Angelo M, Zimbello R, Corso M,  
491 Vannozzi A, Bonghi C, Lucchin M, Valle G** (2014) A deep survey of alternative splicing in grape  
492 reveals changes in the splicing machinery related to tissue, stress condition and genotype. *BMC Plant  
493 Biology* **14**: 99-99
- 494 **Young MD, Wakefield MJ, Smyth GK, Oshlack A** (2010) Gene ontology analysis for RNA-seq:  
495 accounting for selection bias. *Genome Biol* **11**: R14
- 496
